# Supplementary material
Source: publisher figshare collection journal article supplement (https://tandf.figshare.com/articles/dataset/_/1323267)
Supplement: Supplementary file 4 [file 2]

**Supplementary Material for  
Statistical Inference for Power Law Process with Competing Risks**

Anupap Somboonsavatdee, Ananda Sen

**Proof of Theorem 1 in Section 2.2.1**

*Proof.* From the expressions in Equation (4) in the main text, we see that  $\hat{\mu} = \sum_{j=1}^J \hat{\mu}_j = n/t_n^{\hat{\beta}}$ , which can be used to arrive at the identity (after rearranging some terms),

$$\sqrt{n}(\log n)^{-1}(\log \hat{\mu} - \log \mu) = \sqrt{n}(\log n)^{-1}(\log n - \log \mu - \beta \log t_n) - \sqrt{n}(\hat{\beta} - \beta) \frac{\log t_n}{\log n}. \quad (1)$$

From Equation (5) in the article, we note that  $2\mu t_n^{\beta} \sim \chi_{2n}^2$ , which readily yields the large sample result

$$\sqrt{n} \left( \frac{\mu t_n^{\beta}}{n} - 1 \right) \xrightarrow{d} N(0, 1). \quad (2)$$

By an application of delta method on (2),

$$\sqrt{n}(\log \mu + \beta \log t_n - \log n) \xrightarrow{d} N(0, 1) \quad (3)$$

and hence the first term in (1) is  $o_p(1)$ . This yields  $\log t_n / \log n \xrightarrow{p} 1/\beta$  and thus (1) can be reexpressed as

$$\sqrt{n}(\log n)^{-1}(\log \hat{\mu} - \log \mu) = -\beta^{-1}W_{3n} + o_p(1),$$

which, upon applying delta method, simplifies to the relation  $W_{2n} = -\mu\beta^{-1}W_{3n} + o_p(1)$ . Thus the limiting distributions (if they exist) of  $W_{2n}, W_{3n}$  are constant multiples of each other. Since  $2n\beta/\hat{\beta} \sim \chi_{2(n-1)}^2$ , the limiting distribution of  $W_{3n}$  is easily seen to be  $N(0, \beta^2)$ . Combining these, we get

$$(W_{2n}, W_{3n})' \xrightarrow{d} N_2 \left( \mathbf{0}, \begin{bmatrix} \mu^2 & -\mu\beta \\ -\mu\beta & \beta^2 \end{bmatrix} \right).$$

We arrive at our result upon using the normal approximation to multinomial distribution. □

**Proof of Fact 1 in Section 2.2.1**

*Proof.* We shall drop the argument  $\phi^0$  in the expressions of the likelihood and its derivatives for brevity. The log-likelihood function is written as

$$\log L = \sum_{j=1}^J n_j \log \mu_j - t_n^{\beta} \sum_{j=1}^J \mu_j + (\beta - 1) \sum_{i=1}^n \log t_i + n \log \beta,$$

which, upon differentiating w.r.t. the parameters yields the score vector  $(l_{1n}, \dots, l_{J+1,n})'$  as

$$\begin{aligned} l_{jn} &= \frac{\partial \log L}{\partial \mu_j} = \frac{n_j}{\mu_j} - t_n^\beta, \quad j = 1, \dots, J, \\ l_{J+1,n} &= \frac{\partial \log l}{\partial \beta} = -t_n^\beta \log t_n \sum_{j=1}^J \mu_j + \sum_{i=1}^n \log t_i + \frac{n}{\beta}. \end{aligned}$$

Denote by  $Z_n$  the random variable

$$Z_n \equiv n^{1/2} \left[ \frac{t_n^\beta \sum_{j=1}^J \mu_j}{n} - 1 \right].$$

Recalling that  $\rho_j = \mu_j / \sum_{j=1}^J \mu_j$ , and  $\hat{\rho}_j = n_j / n$ , we have

$$\begin{aligned} n^{-1/2} l_{jn} &= n^{1/2} \left( \frac{\hat{\rho}_j}{\mu_j} - \frac{t_n^\beta}{n} \right) \\ &= \frac{n^{1/2}}{\sum_{j=1}^J \mu_j} \left( \frac{\hat{\rho}_j}{\rho_j} - \frac{t_n^\beta \sum_{j=1}^J \mu_j}{n} \right) \\ &= \frac{1}{\sum_{j=1}^J \mu_j} [\rho_j^{-1} n^{1/2} (\hat{\rho}_j - \rho_j) - Z_n], \end{aligned} \tag{4}$$

and

$$\begin{aligned} n^{-1/2} (\log n)^{-1} l_{J+1,n} &= -n^{1/2} \left[ \frac{\log t_n}{\log n} \left\{ \frac{t_n^\beta \sum_{j=1}^J \mu_j}{n} - 1 \right\} \right] - n^{1/2} (\log n)^{-1} [\hat{\beta}^{-1} - \beta^{-1}] \\ &= -\beta^{-1} Z_n + \beta^{-2} (\log n)^{-1} W_{3n} + o_p(1), \end{aligned} \tag{5}$$

where  $W_{3n}$  is as in Theorem 1. The second equality uses the fact that  $(\log t_n / \log n) \xrightarrow{p} 1/\beta$ . The second term in (5) is  $o_p(1)$  since  $W_{3n}$  has an asymptotic normal distribution. Further, for each  $j$ ,  $\hat{\rho}_j$  and  $Z_n$  are independent, asymptotically normal in view of Theorem 1 and Equation (4) in the main article. **Fact 1** is then established from (4) and (5).  $\square$

### Proof of Fact 2 in Section 2.2.1

*Proof.* It suffices to prove the convergence of the (scaled) second derivative matrix of the log-likelihood at the true parameter  $\phi^0$ . The uniform convergence in a shrinking neighborhood around  $\phi^0$  follows by continuity. The components of the  $(J+1) \times (J+1)$  second-derivative matrix of the log-likelihood are given for  $j = 1, \dots, J$ , by:

$$\begin{aligned}
a_{jj} &= \frac{\partial^2 \log L}{\partial \mu_j^2} = -\frac{n_j}{\mu_j^2}, \quad a_{jj'} = \frac{\partial^2 \log L}{\partial \mu_j \partial \mu_{j'}} = 0, \quad j' = 1, \dots, J; j' \neq j, \\
a_{J+1, J+1} &= \frac{\partial^2 \log L}{\partial \beta^2} = -t_n^\beta (\log t_n)^2 \sum_{j=1}^J \mu_j - \frac{n}{\beta^2} \\
a_{J+1, j} &= \frac{\partial^2 \log L}{\partial \beta \partial \mu_j} = -t_n^\beta \log t_n.
\end{aligned}$$

Let us define

$$\mathbf{C}_n = n^{-1} \begin{bmatrix} a_{11} & \cdot & \cdot & \cdot & a_{1J} & a_{1, J+1}/(\log n) \\ \cdot & \cdot & \cdot & \cdot & \cdot & \cdot \\ \cdot & \cdot & \cdot & \cdot & \cdot & \cdot \\ a_{1J} & \cdot & \cdot & \cdot & a_{JJ} & a_{J, J+1}/(\log n) \\ a_{1, J+1}/(\log n) & \cdot & \cdot & \cdot & a_{J, J+1}/(\log n) & a_{J+1, J+1}/(\log n)^2 \end{bmatrix}$$

The Taylor series expansion in Equation (9) of the main article follows. That  $\mathbf{C}_n$  converges in probability to a non-stochastic matrix follows by noting for  $j = 1, \dots, J$

$$\begin{aligned}
n^{-1} a_{jj} &\xrightarrow{p} -\rho_j \mu_j^{-2}, \\
n^{-1} (\log n)^{-2} a_{J+1, J+1} &= -\left(\frac{\log t_n}{\log n}\right)^2 \frac{t_n^\beta \sum_{j=1}^J \mu_j}{n} \xrightarrow{p} -\beta^{-2}, \\
(n \log n)^{-1} a_{J+1, j} &\xrightarrow{p} -(\beta \mu)^{-1}.
\end{aligned}$$

□

We require a lemma to prepare the groundwork for proving Theorem 2.

**Lemma 1.** *Let us assume without loss of generality,  $\beta_1 = \max_j \beta_j$ . Then  $n \rightarrow \infty$ ,*

- (a)  $n_1/n \xrightarrow{a.s.} 1$ , (b)  $n_j / [\mu_j (n/\mu_1)^{\beta_j/\beta_1}] \xrightarrow{a.s.} 1$  for  $j = 2, 3, \dots, J$ ,
- (c)  $\log n_1 / \log n \xrightarrow{a.s.} 1$ , (d)  $\log n_j / \log(\mu_j (n/\mu_1)^{\beta_j/\beta_1}) \xrightarrow{a.s.} 1$  for  $j = 2, 3, \dots, J$ .

*Proof.* Since overall system failures follow NHPP with cumulative intensity function  $\Lambda(t) = \sum_{j=1}^J \mu_j t^{\beta_j}$  with  $\lim_{t \rightarrow \infty} \Lambda(t) = \infty$ , we have, from properties of a NHPP,

$$n / \left( \sum_{j=1}^J \mu_j t_n^{\beta_j} \right) \xrightarrow{a.s.} 1 \text{ and } t_n \xrightarrow{a.s.} \infty, \text{ as } n \rightarrow \infty. \quad (6)$$

With the second result in (6), we also get

$$n_j/\mu_j t_n^{\beta_j} \xrightarrow{a.s.} 1, \text{ as } n \rightarrow \infty. \quad (7)$$

Since  $\beta_1 = \max_j \beta_j$ ,  $\lim_{t \rightarrow \infty} \mu_1 t^{\beta_1} / (\sum_{j=1}^J \mu_j t^{\beta_j}) = 1$ . Hence,

$$\frac{n_1}{n} = \frac{n_1}{\mu_1 t_n^{\beta_1}} \times \frac{\mu_1 t_n^{\beta_1}}{\sum_{j=1}^J \mu_j t_n^{\beta_j}} \times \frac{\sum_{j=1}^J \mu_j t_n^{\beta_j}}{n} \xrightarrow{a.s.} 1 \text{ and } \frac{\mu_1 t_n^{\beta_1}}{n} \xrightarrow{a.s.} 1, \text{ as } n \rightarrow \infty. \quad (8)$$

By applying (7) and (8), it follows that

$$\frac{n_j}{\mu_j (n/\mu_1)^{\beta_j/\beta_1}} = \frac{n_j}{\mu_j t_n^{\beta_j}} \times \left( \frac{\mu_1 t_n^{\beta_1}}{n} \right)^{\beta_j/\beta_1} \xrightarrow{a.s.} 1, \text{ as } n \rightarrow \infty. \quad (9)$$

Parts (c) and (d) of Lemma 1 follow in a similar manner.  $\square$

## Proof of Theorem 2

*Proof.* Let

$$S_{jn} = \beta_j \sum_{i=1}^n \log(t_n/t_i) I(\delta_i = j) = n_j \beta_j / \hat{\beta}_j, \text{ and } v_{jn} = (S_{jn} - n_j) / \sqrt{n_j}.$$

We need to show that  $(v_{1n}, v_{2n}, \dots, v_{Jn})' \xrightarrow{d} N_J(\mathbf{0}, \mathbf{I}_J)$ , as  $n \rightarrow \infty$  with  $\mathbf{I}_J$  denotes  $J \times J$  identity matrix. This can be shown by argument on moment generating functions of  $v_{1n}, v_{2n}, \dots, v_{Jn}$ . First, we assume  $\delta_n = 1$ . Using Equation (13) from the article, we have  $S_{1n}|n_1 \sim \text{Gamma}(n_1, 1)$ . Hence,

$$\mathbb{E}[e^{v_{1n}t}] = \mathbb{E}_{n_1} \left[ \mathbb{E} \left( e^{\frac{1}{\sqrt{n_1}}(S_{1n} - n_1)} \mid n_1 \right) \right] = \mathbb{E}_{n_1} \left[ e^{\sqrt{n_1}t} \left( \frac{1}{1 - \frac{t}{\sqrt{n_1}}} \right)^{n_1} \right].$$

By applying Taylor series expansion, we get

$$\log \left[ e^{\sqrt{n_1}t} \left( \frac{1}{1 - \frac{t}{\sqrt{n_1}}} \right)^{n_1} \right] = t^2/2 + o(n_1^{-1/2}).$$

Using Lemma 1(a), it follows that  $\mathbb{E}[e^{v_{1n}t}] = \exp[t^2/2 + o_p(n^{-1/2})]$ . The result remains the same if  $\delta_n \neq 1$ . Thus,  $v_{1n} \rightarrow^d N(0, 1)$ . Apply the same strategy in conjunction with Lemma 1(c) to conclude  $v_{jn} \rightarrow^d N(0, 1)$  for  $j = 2, 3, \dots, J$ . Furthermore, with given  $t_n, S_{1n}, S_{2n}, \dots$ , and  $S_{Jn}$  are mutually independent because they are functions of failure times corresponding to  $J$  independent failure modes. Additionally, by Lemma 1(a),  $t_n/(n/\mu_1)^{1/\beta_1} \xrightarrow{a.s.} 1$  as  $n \rightarrow \infty$ ,

implying that  $S_{1n}, S_{2n}, \dots, S_{Jn}$  are asymptotically mutually independent unconditional on  $t_n$ . Hence,  $(v_{1n}, v_{2n}, \dots, v_{Jn})' \xrightarrow{d} N_J(\mathbf{0}, \mathbf{I}_J)$ .

For  $j = 2, \dots, J$ , let  $U_{jn}^* = \sqrt{g_j(n)}(\log g_j(n))^{-1}(\hat{\mu}_j - \mu_j)$  and  $V_{jn}^* = \sqrt{g_j(n)}(\hat{\beta}_j - \beta_j)$  with  $g_j(n) = \mu_j(n/\mu_1)^{\beta_j/\beta_1}$ . Note that  $\hat{\beta}_j = n_j\beta_j/S_{jn}$  for  $j = 1, 2, \dots, J$ . By Lemma 1, it follows that

$$V_{1n} = -\beta_1 v_{1n} + o_p(1) \text{ and } V_{jn}^* = -\beta_j v_{jn} + o_p(1). \quad (10)$$

Note that

$$\log \hat{\mu}_1 = (\log n_1) \left(1 - \frac{\hat{\beta}_1}{\beta_1}\right) - \frac{\hat{\beta}_1}{\beta_1} \log \left(\frac{\mu_1 t_n^{\beta_1}}{n_1}\right) + \frac{\hat{\beta}_1}{\beta_1} \log \mu_1. \quad (11)$$

Algebraic manipulation of the terms in (11) and a subsequent application of the results from Lemma 1 yield

$$\sqrt{n}(\log n)^{-1}(\log \hat{\mu}_1 - \log \mu_1) = v_{1n} + o_p(1).$$

By Taylor series expansion, we have  $U_{1n} = \mu_1 v_{1n} + o_p(1)$ . Similarly,  $U_{jn}^* = \mu_j v_{jn} + o_p(1)$ , and one finally arrives at

$$U_{jn} = \sqrt{\frac{\mu_1^{\beta_j/\beta_1}}{\mu_j}} \cdot \frac{\beta_j}{\beta_1} U_{jn}^* + o_p(1) \text{ and } V_{jn} = \sqrt{\frac{\mu_1^{\beta_j/\beta_1}}{\mu_j}} V_{jn}^*. \quad (12)$$

The result follows in view of (10) and (12).  $\square$

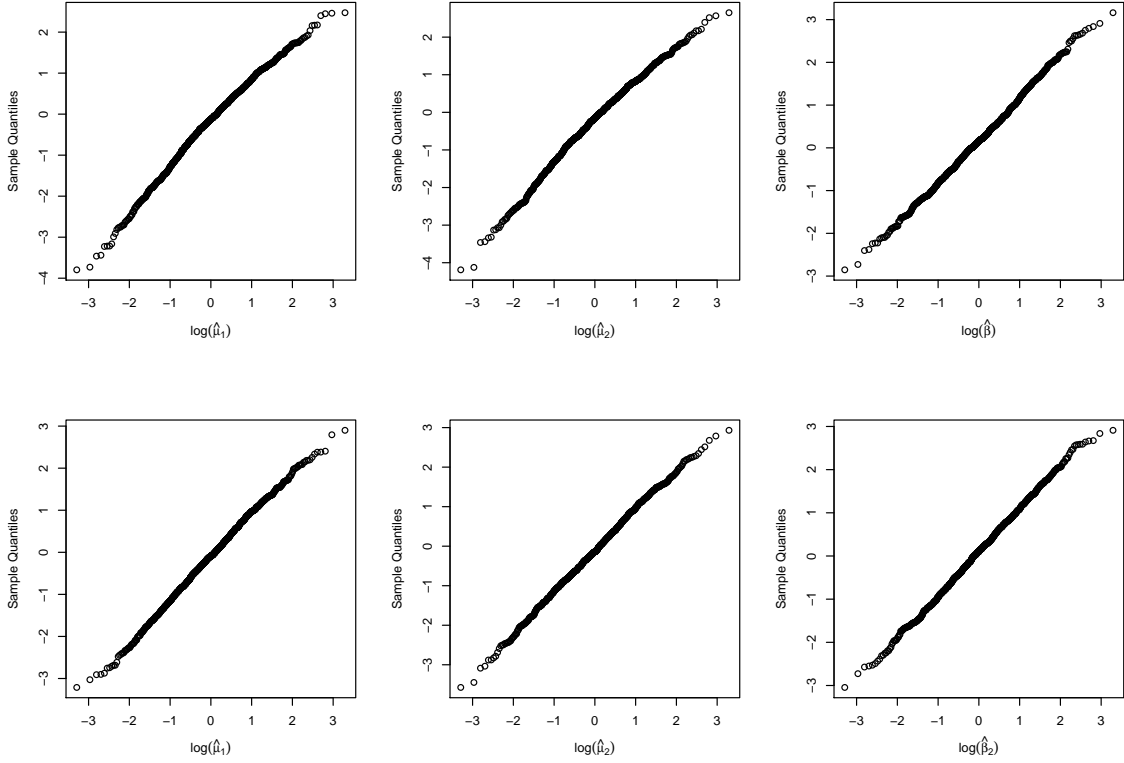

Supplementary Figure 1: Q-Q plots of the scaled and centered log-MLEs for true  $\mu_1 = .65, \mu_2 = .35, \beta = .5$  with sample sizes of 100 (top row) and 500 (bottom row)

Supplementary Table 1: Automotive Warranty Data

| Mileage | Mode |
|---------|------|---------|------|---------|------|---------|------|---------|------|---------|------|---------|------|---------|------|
| 1.21    | 1    | 30.00   | 1    | 174.00  | 1    | 514.00  | 2    | 879.00  | 3    | 1347.00 | 3    | 1938.00 | 3    | 2574.00 | 2    |
| 1.48    | 2    | 38.00   | 3    | 175.00  | 2    | 515.00  | 3    | 887.00  | 1    | 1349.00 | 1    | 1951.00 | 3    | 2606.00 | 3    |
| 1.53    | 2    | 40.05   | 2    | 182.00  | 2    | 519.00  | 2    | 888.26  | 3    | 1350.00 | 3    | 1953.00 | 2    | 2719.00 | 2    |
| 1.66    | 2    | 40.35   | 3    | 189.00  | 2    | 520.00  | 1    | 888.91  | 3    | 1355.00 | 3    | 1957.00 | 3    | 2720.00 | 2    |
| 1.76    | 1    | 40.72   | 1    | 196.07  | 2    | 525.62  | 3    | 914.00  | 2    | 1370.00 | 2    | 1961.03 | 2    | 2750.00 | 3    |
| 1.81    | 2    | 40.92   | 3    | 196.21  | 2    | 526.00  | 2    | 920.00  | 1    | 1375.00 | 3    | 1961.84 | 2    | 2755.00 | 2    |
| 2.23    | 1    | 41.00   | 1    | 196.81  | 3    | 532.00  | 2    | 938.00  | 3    | 1380.00 | 3    | 1979.00 | 3    | 2767.00 | 2    |
| 2.30    | 3    | 47.10   | 2    | 210.00  | 2    | 535.00  | 2    | 944.00  | 2    | 1393.00 | 1    | 1987.00 | 3    | 2800.00 | 3    |
| 2.41    | 1    | 47.66   | 2    | 218.00  | 3    | 543.00  | 3    | 960.00  | 2    | 1440.00 | 3    | 2016.00 | 2    | 2801.35 | 3    |
| 2.49    | 1    | 48.20   | 1    | 223.85  | 1    | 558.10  | 2    | 975.00  | 3    | 1447.00 | 3    | 2017.05 | 3    | 2801.68 | 3    |
| 2.75    | 1    | 48.41   | 2    | 223.87  | 2    | 558.79  | 2    | 979.00  | 2    | 1457.10 | 2    | 2017.17 | 3    | 2840.00 | 3    |
| 3.23    | 1    | 48.93   | 2    | 233.00  | 1    | 559.00  | 3    | 984.00  | 3    | 1457.54 | 2    | 2017.96 | 2    | 2850.00 | 3    |
| 3.61    | 2    | 54.00   | 2    | 237.00  | 2    | 562.00  | 3    | 985.71  | 3    | 1488.00 | 1    | 2026.01 | 2    | 2868.00 | 3    |
| 3.64    | 1    | 59.00   | 2    | 248.00  | 1    | 567.00  | 2    | 985.84  | 3    | 1499.00 | 2    | 2026.72 | 3    | 2883.00 | 3    |
| 3.76    | 1    | 61.59   | 2    | 250.00  | 3    | 569.00  | 1    | 996.11  | 2    | 1507.00 | 2    | 2028.00 | 2    | 2898.00 | 1    |
| 5.09    | 2    | 61.65   | 1    | 259.00  | 1    | 590.55  | 1    | 996.29  | 3    | 1512.00 | 3    | 2040.00 | 3    | 2921.00 | 3    |
| 5.27    | 1    | 62.37   | 1    | 265.00  | 2    | 590.98  | 2    | 996.98  | 3    | 1521.30 | 2    | 2055.00 | 2    | 2939.00 | 2    |
| 5.34    | 1    | 62.71   | 1    | 279.00  | 2    | 604.09  | 3    | 1015.00 | 2    | 1521.72 | 3    | 2083.00 | 3    | 2959.63 | 1    |
| 5.37    | 1    | 74.00   | 3    | 288.00  | 3    | 604.39  | 2    | 1037.00 | 1    | 1535.55 | 3    | 2090.00 | 1    | 2959.85 | 2    |
| 5.47    | 1    | 76.00   | 2    | 293.00  | 2    | 604.54  | 2    | 1041.22 | 2    | 1535.83 | 3    | 2091.00 | 3    | 2964.00 | 3    |
| 5.51    | 1    | 77.20   | 1    | 294.00  | 3    | 604.82  | 2    | 1041.48 | 2    | 1599.00 | 1    | 2097.00 | 3    | 2966.00 | 3    |
| 6.23    | 1    | 77.22   | 1    | 300.00  | 3    | 620.45  | 1    | 1081.00 | 3    | 1603.22 | 3    | 2104.00 | 3    | 2972.00 | 1    |
| 6.39    | 2    | 81.00   | 2    | 309.00  | 2    | 620.80  | 1    | 1086.00 | 3    | 1603.64 | 3    | 2105.00 | 2    |         |      |
| 7.00    | 3    | 97.00   | 3    | 313.45  | 3    | 620.82  | 1    | 1097.00 | 3    | 1622.00 | 1    | 2126.00 | 2    |         |      |
| 8.28    | 2    | 98.00   | 1    | 313.65  | 3    | 645.00  | 3    | 1104.00 | 2    | 1631.07 | 3    | 2127.00 | 3    |         |      |
| 8.62    | 1    | 102.00  | 2    | 325.00  | 3    | 654.26  | 3    | 1107.00 | 2    | 1631.61 | 3    | 2144.07 | 3    |         |      |
| 10.21   | 3    | 109.27  | 1    | 329.00  | 1    | 654.27  | 1    | 1116.00 | 3    | 1633.00 | 3    | 2144.28 | 3    |         |      |
| 10.26   | 2    | 109.55  | 2    | 331.00  | 1    | 665.00  | 1    | 1135.00 | 1    | 1662.00 | 3    | 2144.30 | 3    |         |      |
| 10.33   | 2    | 117.00  | 2    | 367.00  | 1    | 677.00  | 3    | 1137.00 | 2    | 1668.00 | 2    | 2164.00 | 3    |         |      |
| 10.74   | 3    | 120.00  | 3    | 374.00  | 3    | 696.00  | 3    | 1140.69 | 3    | 1692.00 | 3    | 2168.00 | 3    |         |      |
| 10.78   | 2    | 121.00  | 2    | 378.00  | 3    | 709.00  | 3    | 1140.78 | 3    | 1693.00 | 3    | 2176.00 | 3    |         |      |
| 10.82   | 3    | 123.00  | 3    | 386.00  | 1    | 753.00  | 3    | 1140.91 | 3    | 1696.09 | 2    | 2198.00 | 2    |         |      |
| 11.19   | 1    | 124.00  | 2    | 395.00  | 3    | 756.00  | 3    | 1181.00 | 3    | 1696.24 | 1    | 2205.00 | 3    |         |      |
| 11.46   | 1    | 125.06  | 3    | 396.44  | 1    | 760.03  | 3    | 1200.04 | 3    | 1696.37 | 3    | 2270.00 | 3    |         |      |
| 11.55   | 1    | 125.31  | 3    | 396.76  | 1    | 760.65  | 3    | 1200.57 | 3    | 1722.00 | 3    | 2296.42 | 1    |         |      |
| 11.64   | 1    | 127.00  | 3    | 397.59  | 1    | 760.70  | 2    | 1200.69 | 3    | 1731.00 | 1    | 2296.73 | 1    |         |      |
| 12.01   | 2    | 129.43  | 1    | 397.99  | 1    | 776.00  | 3    | 1240.70 | 1    | 1733.00 | 1    | 2313.12 | 3    |         |      |
| 12.08   | 1    | 129.99  | 1    | 400.00  | 1    | 777.00  | 1    | 1240.77 | 2    | 1779.50 | 3    | 2314.00 | 3    |         |      |
| 12.76   | 1    | 135.00  | 2    | 408.00  | 2    | 787.00  | 2    | 1250.00 | 3    | 1779.62 | 3    | 2316.00 | 3    |         |      |
| 13.15   | 3    | 136.00  | 2    | 416.00  | 2    | 801.00  | 3    | 1270.00 | 3    | 1805.00 | 3    | 2324.00 | 2    |         |      |
| 13.74   | 1    | 138.00  | 3    | 436.00  | 3    | 816.61  | 2    | 1287.00 | 2    | 1812.00 | 3    | 2329.00 | 2    |         |      |
| 14.18   | 1    | 149.07  | 1    | 447.00  | 1    | 816.65  | 2    | 1301.00 | 3    | 1838.39 | 2    | 2338.00 | 1    |         |      |
| 14.59   | 2    | 149.07  | 1    | 461.68  | 2    | 827.49  | 3    | 1303.00 | 1    | 1838.53 | 3    | 2368.05 | 1    |         |      |
| 16.42   | 2    | 153.08  | 1    | 461.97  | 3    | 827.55  | 3    | 1315.00 | 3    | 1842.00 | 1    | 2368.88 | 2    |         |      |
| 16.43   | 2    | 153.26  | 1    | 470.00  | 3    | 827.82  | 2    | 1322.08 | 3    | 1854.00 | 3    | 2387.00 | 2    |         |      |
| 21.19   | 2    | 154.00  | 1    | 484.00  | 3    | 840.17  | 3    | 1322.35 | 3    | 1861.54 | 3    | 2411.00 | 1    |         |      |
| 21.31   | 1    | 155.00  | 1    | 490.00  | 2    | 840.47  | 1    | 1330.00 | 3    | 1861.95 | 3    | 2420.00 | 2    |         |      |
| 21.56   | 2    | 156.00  | 3    | 503.00  | 3    | 870.00  | 3    | 1333.76 | 3    | 1902.00 | 3    | 2424.00 | 2    |         |      |
| 24.00   | 1    | 157.00  | 3    | 509.30  | 2    | 878.20  | 1    | 1334.00 | 3    | 1911.00 | 1    | 2446.00 | 2    |         |      |
| 28.00   | 1    | 170.00  | 1    | 509.49  | 2    | 878.56  | 1    | 1343.00 | 3    | 1912.00 | 2    | 2524.00 | 2    |         |      |

Supplementary Table 2: MLEs from ten generations of data with random tie breaking

| MLE             | Data No. |       |       |       |       |       |       |       |       |       |
|-----------------|----------|-------|-------|-------|-------|-------|-------|-------|-------|-------|
|                 | 1        | 2     | 3     | 4     | 5     | 6     | 7     | 8     | 9     | 10    |
| $\hat{\mu}_1$   | 7.098    | 7.079 | 7.132 | 7.045 | 7.096 | 7.100 | 7.055 | 7.131 | 7.078 | 7.056 |
| $\hat{\beta}_1$ | 0.330    | 0.330 | 0.329 | 0.330 | 0.330 | 0.330 | 0.330 | 0.329 | 0.330 | 0.330 |
| $\hat{\mu}_2$   | 3.147    | 3.151 | 3.182 | 3.154 | 3.120 | 3.165 | 3.133 | 3.155 | 3.171 | 3.164 |
| $\hat{\beta}_2$ | 0.453    | 0.453 | 0.452 | 0.453 | 0.454 | 0.452 | 0.454 | 0.453 | 0.452 | 0.453 |
| $\hat{\mu}_3$   | 0.371    | 0.369 | 0.370 | 0.371 | 0.371 | 0.372 | 0.370 | 0.372 | 0.372 | 0.372 |
| $\hat{\beta}_3$ | 0.755    | 0.755 | 0.755 | 0.755 | 0.755 | 0.754 | 0.755 | 0.754 | 0.754 | 0.754 |



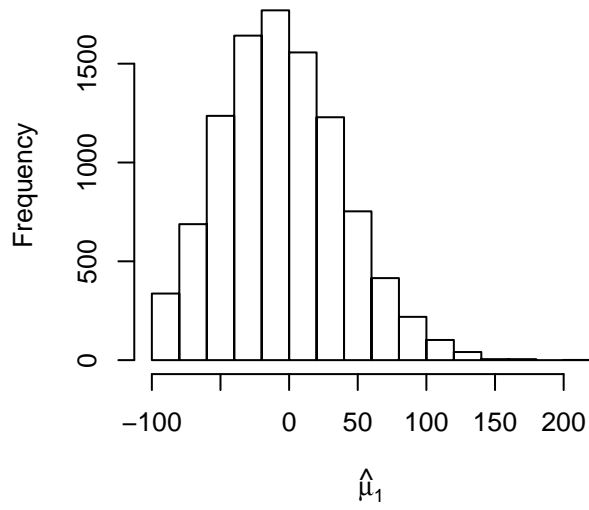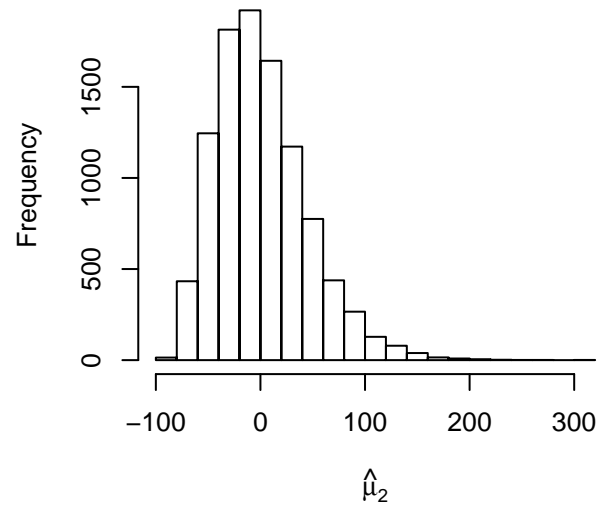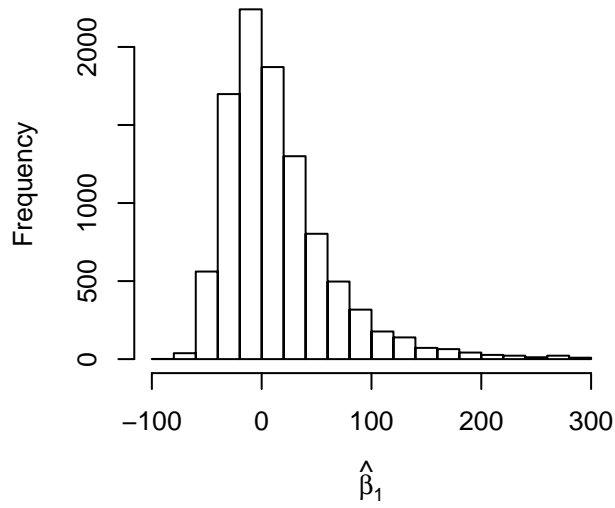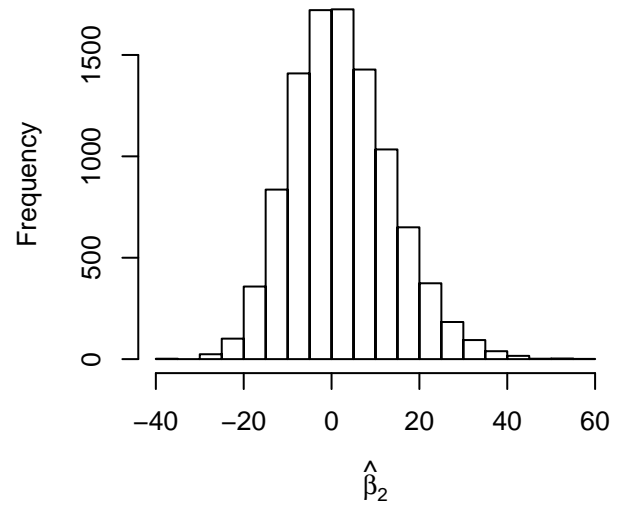

Supplementary Figure 2: Histograms of the relative deviations of the MLEs for  $\mu_1 = 4, \mu_2 = 2, \beta_1 = 0.5, \beta_2 = 2.5$  with sample size  $n = 100$  and 25% masking

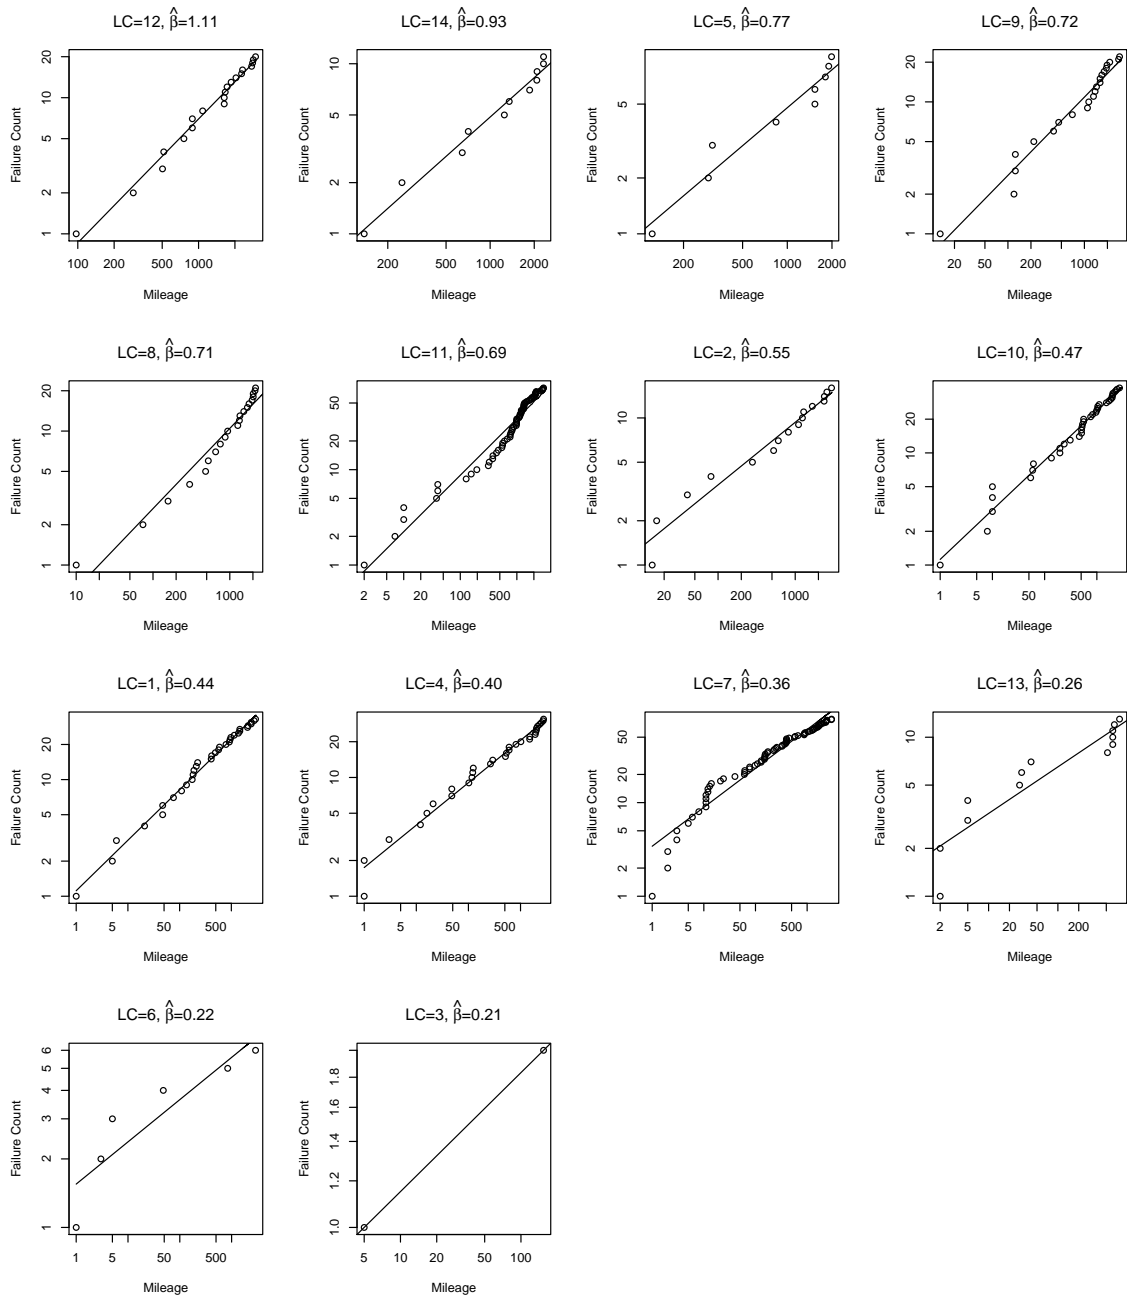

Supplementary Figure 3: Plots of mileage versus failure count in log-log scale for the original labor codes (LC) in the warranty data

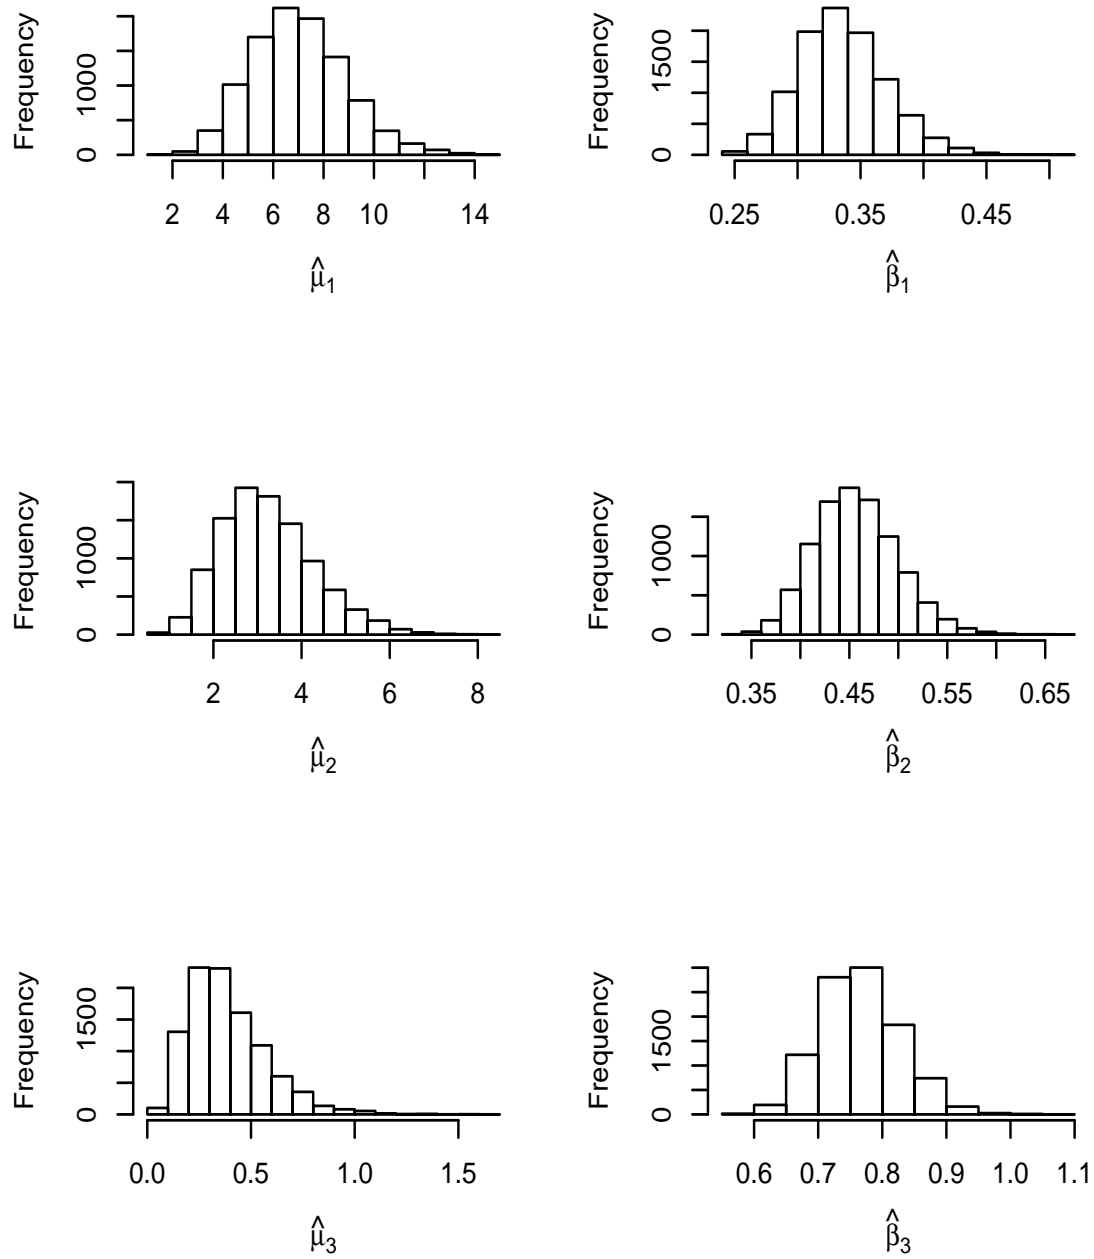

Supplementary Figure 4: Histogram of the MLEs of the parameters for all three failure modes based on the 10,000 bootstrap samples
