# Supplementary material
Source: publisher figshare collection journal article supplement (https://tandf.figshare.com/articles/dataset/_/1323267)

LC=12,  $\hat{\beta}=1.11$

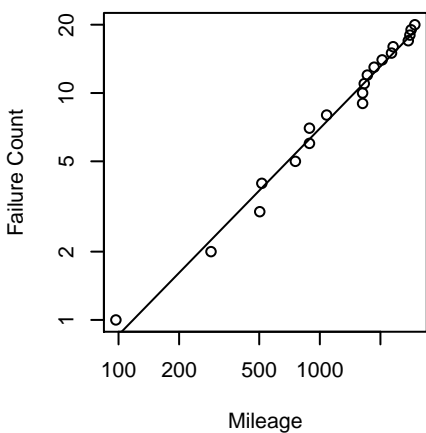

LC=14,  $\hat{\beta}=0.93$

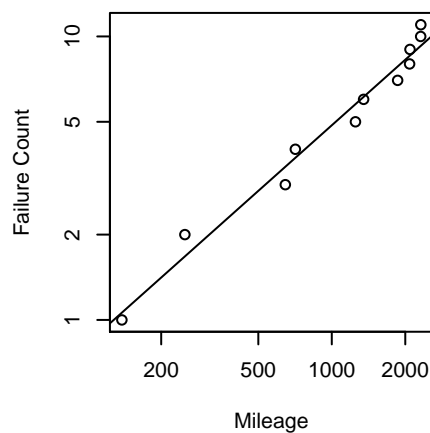

LC=5,  $\hat{\beta}=0.77$

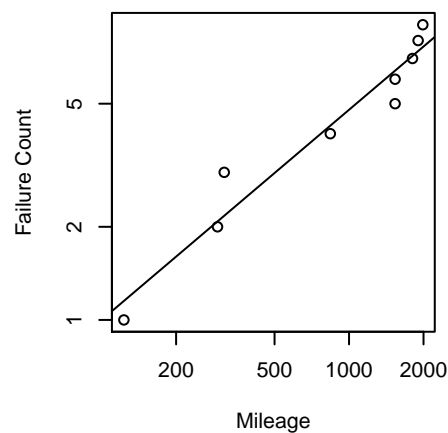

LC=9,  $\hat{\beta}=0.72$

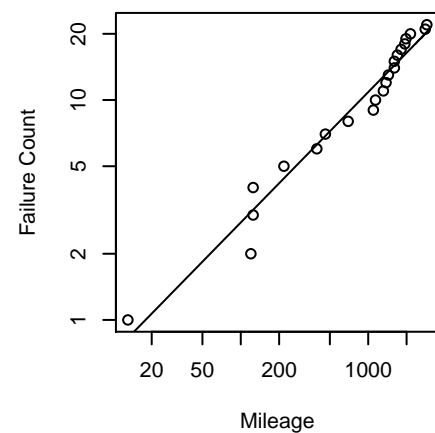

LC=8,  $\hat{\beta}=0.71$

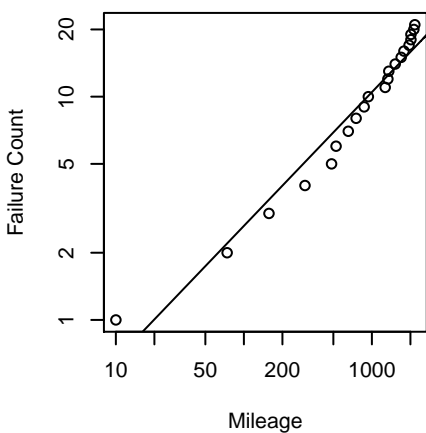

LC=11,  $\hat{\beta}=0.69$

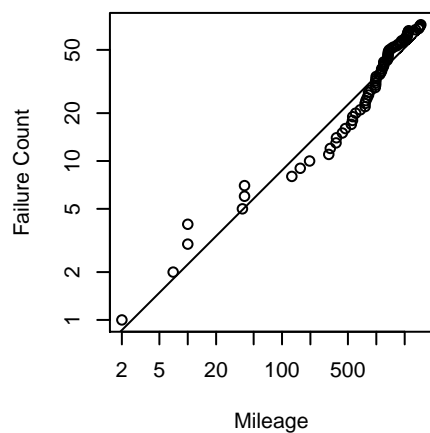

LC=2,  $\hat{\beta}=0.55$

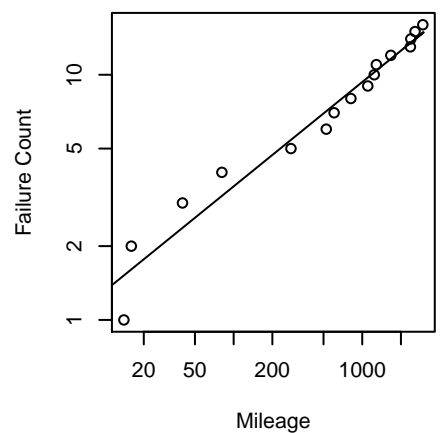

LC=10,  $\hat{\beta}=0.47$

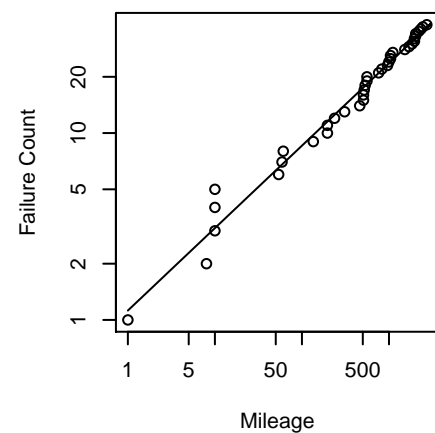

LC=1,  $\hat{\beta}=0.44$

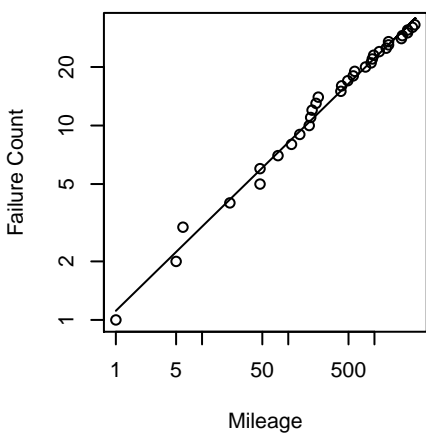

LC=4,  $\hat{\beta}=0.40$

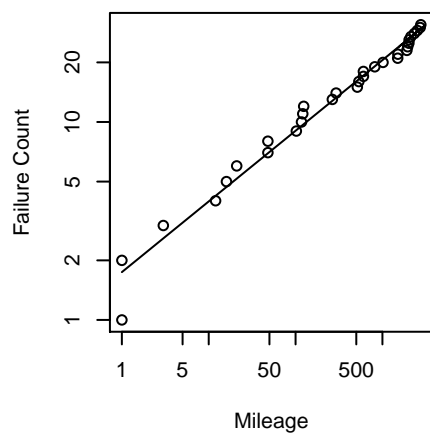

LC=7,  $\hat{\beta}=0.36$

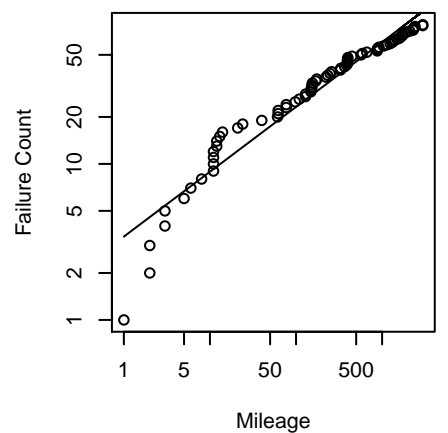

LC=13,  $\hat{\beta}=0.26$

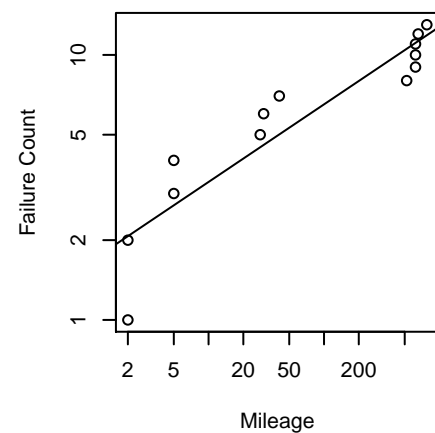

LC=6,  $\hat{\beta}=0.22$

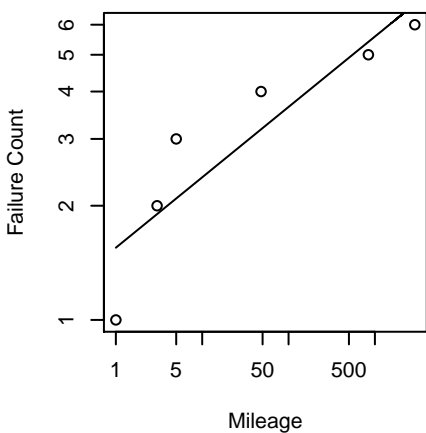

LC=3,  $\hat{\beta}=0.21$

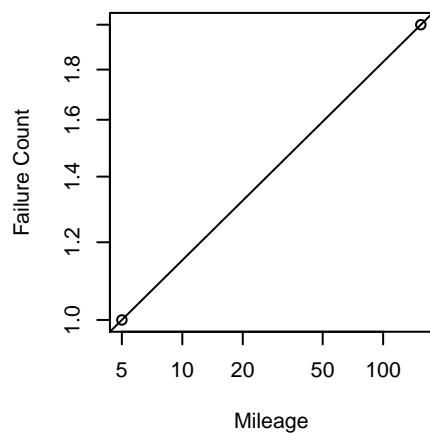

Supplement: Supplementary file 5 [file 2]
